# Supplementary material for: Temperature-responsive membrane permeability of recombinant fusion protein vesicles
Source: Royal Society of Chemistry journal article supplement (doi:10.1039/d3sm00096f), 2023-01-01
Supplement: d3sm00096f1.pdf [file d3sm00096f1.pdf]

## Supplementary Information

### Temperature-Responsive Membrane Permeability of Recombinant Fusion Protein Vesicles

Jackson Powers and Yeongseon Jang\*

Department of Chemical Engineering, University of Florida

1006 Center Drive, FL 32669, USA

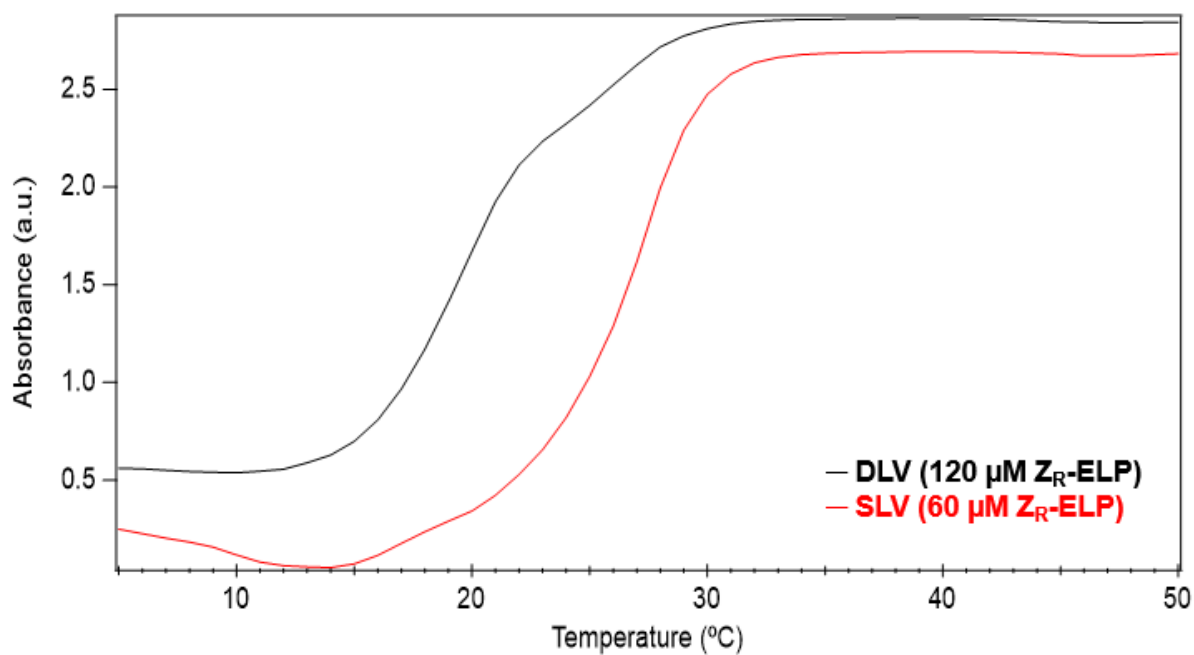

**Figure S1.** Turbidity profiles of SLV and DLV solutions. The transition temperature of ELP is inversely related to the protein concentrations used for the vesicle assembly conditions. Higher Z<sub>R</sub>-ELP concentration for DLV construction resulted in the decrease of transition temperature, as compared to SLV condition<sup>1-3</sup>.

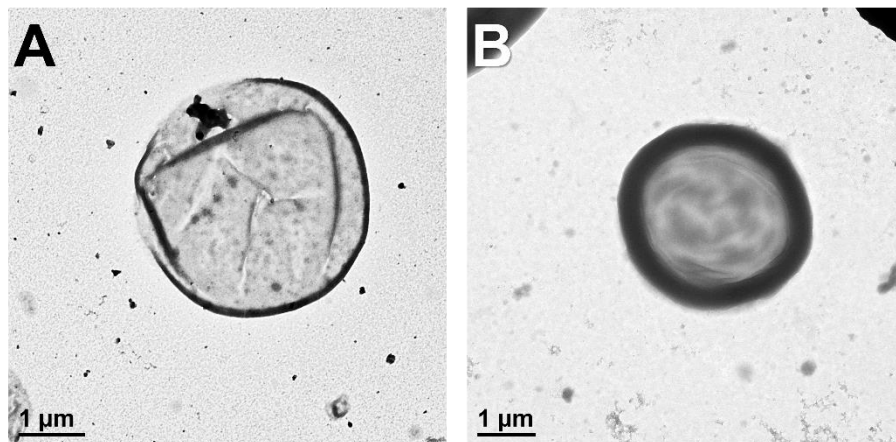

**Figure S2.** TEM images of SLVs at 25 °C and 37 °C. They retain hollow vesicle structures at 37 °C with membrane permeability changes.

### References Cited in Supplementary Information

---

1. Jang, Y.; Choi, W.; Heller, W.; Ke, Z.; Wright, E.; Champion, J., Engineering Globular Protein Vesicles through Tunable Self-Assembly of Recombinant Fusion Proteins. *Small* **2017**, *13* (36).
2. Meyer, D. E.; Chilkoti, A., Quantification of the Effects of Chain Length and Concentration on the Thermal Behavior of Elastin-like Polypeptides. *Biomacromolecules* **2004**, *5* (3), 846-851.
3. Li, N. K.; Quiroz, F. G.; Hall, C. K.; Chilkoti, A.; Yingling, Y. G., Molecular Description of the LCST Behavior of an Elastin-Like Polypeptide. *Biomacromolecules* **2014**, *15* (10), 3522-3530.
